# Supplementary material for: Structural mechanisms of PIP2 activation and SEA0400 inhibition in human cardiac sodium-calcium exchanger NCX1
Source: eLife. 2025 May 28;14:RP105396. doi: 10.7554/eLife.105396 (PMC12119087; doi:10.7554/eLife.105396)
Supplement: Figure 1—source data 1. [file elife-105396-fig1-data1.xlsx]

## Sheet: Sheet1
		Figure 1A				Figure 1B
		WT (peak)	WT (steady state)			WT (peak)	WT (steady state)
		1.57143	5.74074			1.7451	2.125
		2.09091	8			1.79104	2.5
		2	10.8696			1.53226	1.59649
		1.89655	7.7			1.45113	3.64706
		2.16667	6.93333			1.625	1.91667
		2.40625	7.625			1.62963	4
		2.12963	4.86634			1.33333
		2.46667	8.5			1.45455
		1.6506	23.2727
		1.62201	5.8
		2.7
		2.72
		3.71233
		1.66667
