# Supplementary material for: Structural mechanisms of PIP2 activation and SEA0400 inhibition in human cardiac sodium-calcium exchanger NCX1
Source: eLife. 2025 May 28;14:RP105396. doi: 10.7554/eLife.105396 (PMC12119087; doi:10.7554/eLife.105396)
Supplement: Figure 3—source data 1. [file elife-105396-fig3-data1.xlsx]

## Sheet: Sheet1
	Figure 3B
	WT	K164A	R167A	R220A	K225A	R220A-K225A	K164-167-220-225A
	1.57143	2.81818	1.5	0.333333	1.6	1.36842	0.785714
	2.09091	2.85	1.88889	1.80952	1.46154	1.125	0.789474
	2	2.98701	1.09677	1.63636	2.5	1.4	0.533333
	1.89655	2.11765	1.85484	1.5	2.77778	1.28571	1
	2.16667	2.21429	1.44444	1.57143	1.31818		0.583333
	2.40625	1.45161	2.38462	1.03774	2.33333	1.1	0.736842
	2.12963	1.77778	1.75862	1.14286	3.2766	1.3609	1.02083
	2.46667			1.125			0.615385
	1.6506
	1.62201
	2.7
	2.72
	3.71233
	1.66667
	Figure 3C
	WT	K164A	R167A	R220A	K225A	R220A-K225A	K164-167-220-225A
	5.74074	13.5	4.6	0.842105	4.28571	1.85714	0.785714
	8	13.625	9.375	4.85714	5.33333	1.8	0.583333
	10.8696	24.4444	2.83333	3	2.6087	2.05882	0.736842
	7.7	5.83333	6.52941	4	6.4	2.36842	1.06522
	6.93333	5.16667	7.22222	1.8		1.28571	0.615385
	7.625	3.45455	4	1.45455		2.08046
	4.86634	5.16667	6.125	2
	8.5
	23.2727
	5.8
	Figure 3D
	WT	K164A	R167A	R220A	K225A	K164-167-220-225A	R220A-K225A
	0.257143	0.181818	0.3125	0.395833	0.35	1	0.736842
	0.206897	0.2	0.177778	0.333333	0.230769	1	0.625
	0.191667	0.0805195	0.387097	0.545455	0.418182	1	0.68
	0.3125	0.352941	0.274194	0.357143	0.343137	0.958333	0.542857
	0.277778	0.428571	0.2	0.566038		1	0.710938
	0.192771	0.354839	0.192308	0.785714			0.7
	0.322169	0.333333	0.275862	0.5			0.654135
